# Supplementary material for: Immune and nonimmune mechanisms mediate the mental stress-induced tumor growth in a xenograft model of breast cancer
Source: PubMed Central journal article supplement (PMC8542049; doi:10.1038/s41419-021-04280-9), 2021-10-23

## Supplemental information

Immune and nonimmune mechanisms mediate the mental stress-induced tumor growth in a xenograft model of breast cancer

Wenjing Ma<sup>1#</sup>, Pengfei Liu<sup>1#</sup>, Jie Zheng<sup>2#</sup>, Jinhui Lü<sup>1</sup>, Qian Zhao<sup>1</sup>, Danni Li<sup>1</sup>, Yuefan Guo<sup>1</sup>, Lu Qian<sup>1,3</sup>, Qiong Wang<sup>1</sup>, Xinman Miao<sup>1,3</sup> and Zuoren Yu<sup>1\*</sup>

<sup>1</sup>Research Center for Translational Medicine, Shanghai East Hospital, Tongji University School of Medicine, Shanghai, China.

<sup>2</sup>School of Life Sciences and Technology, Tongji University, Shanghai, China.

<sup>3</sup>Jinzhou Medical University, School of Basic Medical Sciences, Jinzhou, Liaoning Province, China.

## Supplemental Figure Legends

Supplemental Figure S1. Dynamic change of the body weight of the mice in both MS and Ctrl groups. Data are presented as the mean  $\pm$  SEM (n=4 for Ctrl group, n=5 for MS group).

Supplemental Figure S2. miRNA target gene prediction analysis derived 298 genes potentially targeted by both miR-346 and miR-493 in rodents, including CCND1.

Supplemental Figure S3. GO terms (A) and KEGG pathways (B) analysis of the 298 target genes of miR-346 and miR-493 showing most significant pathways including neuron regulation, cell apoptosis & death regulation and cancer-related regulation.

Supplemental Figure S4. A. The cell cycle analysis of 4T1 cells with or without treatment of corticosterone. B. Quantitative analysis of the cells at different phases in A. Data are presented as the mean  $\pm$  SEM (n=3). \*\*p<0.01.

**Supplemental Figure S1**

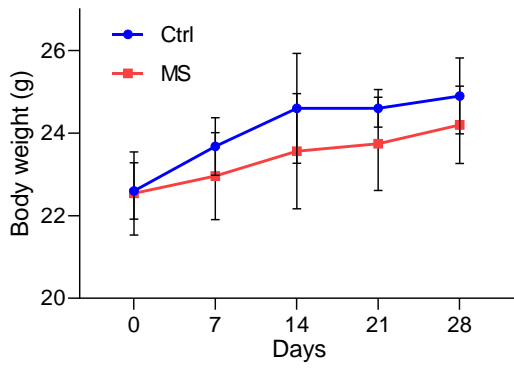

## Supplemental Figure S2

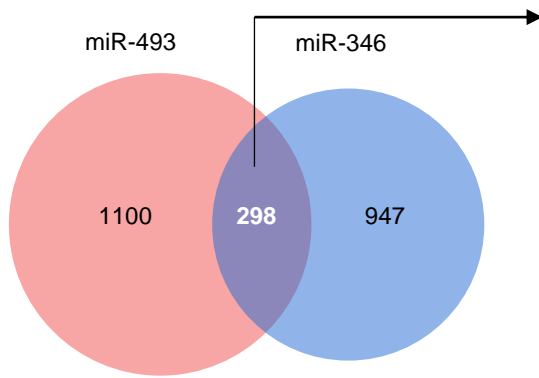

|              |         |          |          |         |          |               |
|--------------|---------|----------|----------|---------|----------|---------------|
| <b>Ccnd1</b> | Tmbim6  | Pfkfb1   | Abca5    | Surf4   | Fam168a  | Purb          |
| Ncoa2        | Scn8a   | Snx30    | Nploc4   | Stom    | Bag3     | Rmnd5b        |
| Fam168b      | Pak2    | Nfia     | Csnk1d   | Zeb2    | Cd151    | Ndel1         |
| Pgap1        | Ubn1    | Cc2d1b   | Adcy1    | Madd    | Tspan4   | Nlgn2         |
| Kif1a        | Yeats2  | Foxj3    | Sertad2  | Ldlrad3 | Eri1     | Akap1         |
| Steap3       | Opa1    | Grik3    | Pank3    | Nlgn3   | Asah1    | Kpnb1         |
| Btg2         | Fstl1   | Phc2     | Aff4     | Rasgrp1 | Stox2    | Pitpnc1       |
| Lamc1        | Qk      | Fndc5    | G3bp1    | Dzank1  | Ncan     | Cfl1          |
| Ier5         | Pdpk1   | Yars     | Tsr1     | Zfp120  | Crtc1    | Fads1         |
| Mpz11        | Fmr1    | Ece1     | Crk      | Plagl2  | Nr2f6    | Osbp          |
| Pea15a       | Ubr2    | Rere     | Flot2    | Bicap   | Slc35e1  | Gnaq          |
| Akt3         | Foxp4   | Ccnl2    | Zfp652   | Znfx1   | Smim7    | Btaf1         |
| Inpp4a       | Khsrp   | Adam22   | Mlt6     | Spata2  | Cmtm4    | Nacc2         |
| Nemp2        | Rab31   | Cplx1    | Dcaf7    | Tmem189 | Ii34     | Sec16a        |
| Pikfyve      | Memo1   | Ulk1     | Egln3    | Nfatc2  | Ikbkg    | Furin         |
| Ctdsp1       | Fam98a  | Kctd10   | Tmem229b | Zfp512b | Kat6a    | Homer2        |
| Eif4e2       | Rhoq    | Ncor2    | Asxl2    | Ncs1    | Sfrp1    | Arnt2         |
| Capn10       | Socs5   | Eif4h    | Rock2    | Dab2ip  | Erlin2   | Xpo6          |
| Zcchc2       | Aqp4    | Rac1     | Pacs2    | Kif5c   | Tusc3    | Clip3         |
| Tor1aip2     | Nr3c1   | Smurf1   | E2f3     | Chp1    | Wdr83os  | Igf1r         |
| Abi2         | Rnf165  | Pcgf3    | Slc22a23 | Stk35   | Nfat5    | Rgma          |
| Desi2        | Impact  | Sppl3    | Golm1    | Itch    | Zfhx3    | Dap           |
| Kcnh1        | Map3k2  | Med13l   | Scamp1   | Epb411l | Galnt2   | Sema5a        |
| Utrn         | Pcdha11 | Bcl7a    | Map3k1   | Ss18l1  | Gm20388  | Zfp41         |
| Ccdc28a      | Pcdha3  | Fam20c   | Klf6     | Dnajc5  | Fam118b  | Gtpbp1        |
| Tnfaip3      | Pcdhac2 | Trrap    | Prpf4b   | Zfp704  | Arhgef12 | Tnrc6b        |
| Col6a1       | Pcdha5  | Cpsf4    | Rreb1    | Gnb4    | Tcf12    | Zc3h7b        |
| Rnf126       | Pcdhac1 | Plxna4   | Nsd1     | Setd7   | Ppm1m    | Ano6          |
| Ap3d1        | Pcdha12 | Vopp1    | Ajuba    | Kpna4   | Trim71   | Rnf38         |
| Slc39a3      | Pcdha1  | Zfp9     | Extl3    | Gria2   | Pin1     | Smap2         |
| Nfic         | Pcdha6  | Mical3   | Dpysl2   | Ahcy1   | Ilf3     | Zfp362        |
| Gas2l3       | Pcdha9  | Tspan9   | Samd8    | Ank2    | Nectin1  | Tnfrsf1b      |
| Nab2         | Pcdha8  | Kras     | Il17rd   | Srsf11  | Rdx      | Kif1b         |
| Lrp11        | Pcdha2  | Peg10    | 6-Mar    | Zc2hc1a | Sema7a   | Tgfbfr1       |
| Fuca2        | Pcdha4  | Aak1     | Phf5a    | Pcdh10  | Wdr82    | Ammecr1       |
| Ccdc6        | Pcdha7  | Slc6a6   | Pacsin2  | Mbnl1   | Cdc25a   | D17Wsu92e     |
| Midn         | Eif1a   | Bhlhe40  | Till12   | Mfsd1   | Ubp1     | E130308A19Rik |
| Zbtb7a       | Nedd4l  | Arl8b    | Hdac7    | Etv3    | Cmtm6    | D430041D05Rik |
| Timp3        | Mbp     | Rasgef1a | Arf3     | Pbxip1  | Dynlt3   | 2310022B05Rik |
| Slc6a15      | Capn1   | Foxj2    | Kmt2d    | Mib2    | Ids      | 4933434E20Rik |
| E2f7         | Ranbp6  | Shisa7   | Itga5    | Txnip   | Zfx      |               |
| Ankrd52      | Mgea5   | Ehd2     | Prkaa1   | Sec24d  | Zmym3    |               |
| Nudcd3       | Fosl1   | Capns1   | Lifr     | Fubp1   | Rlim     |               |

# Supplemental Figure S3

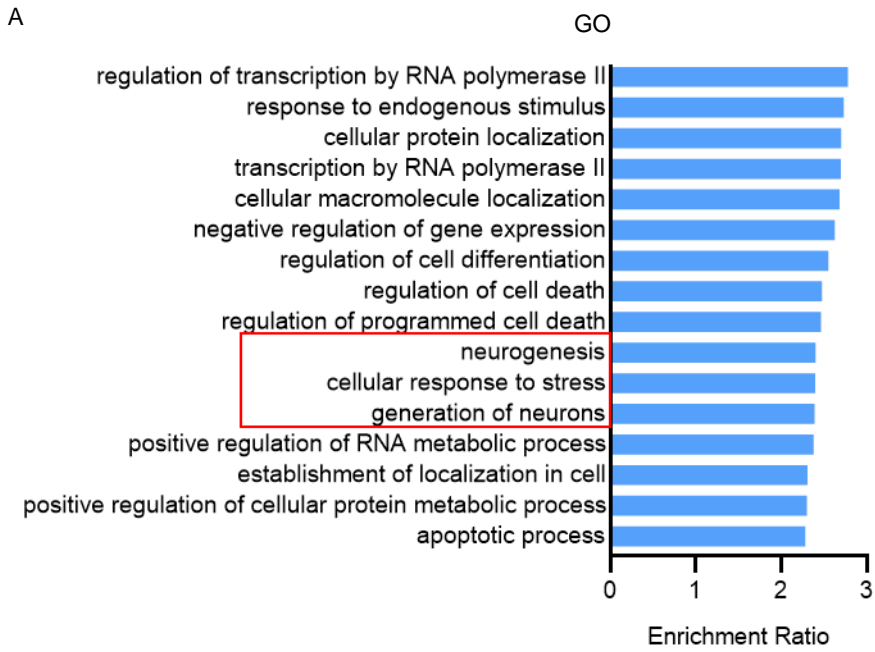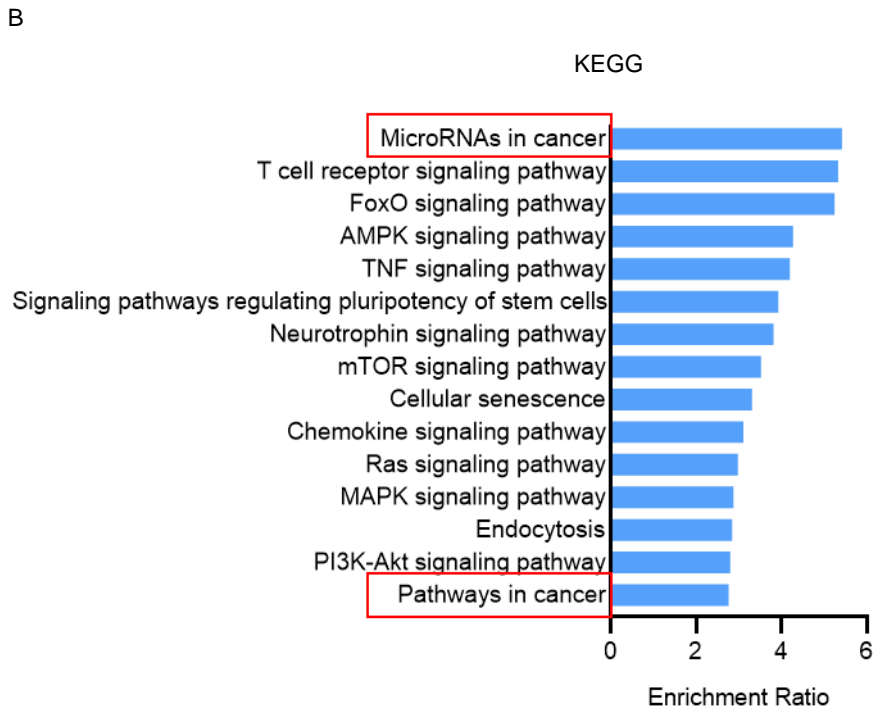

# Supplemental Figure S4

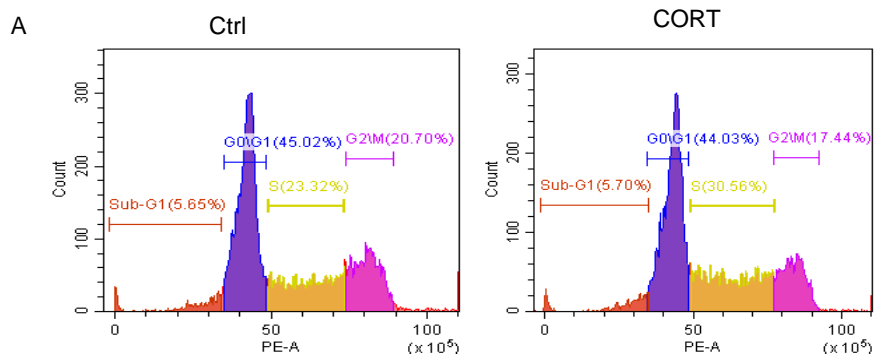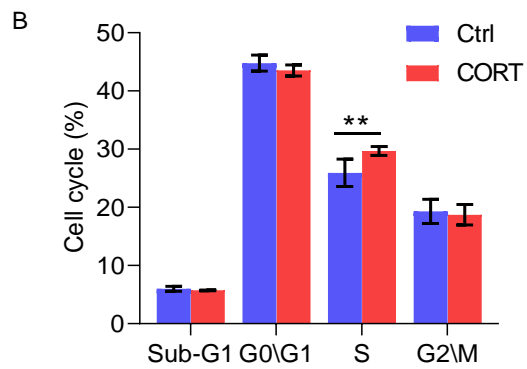

Supplement: 41419_2021_4280_MOESM1_ESM.pdf [file 41419_2021_4280_MOESM1_ESM.pdf]
